# Supplementary material
Source: Springer Nature journal article supplement (https://www.springermedizin.de/resource/supplementary/12943_2010_720_MOESM2_ESM.pdf/9554654)

A.

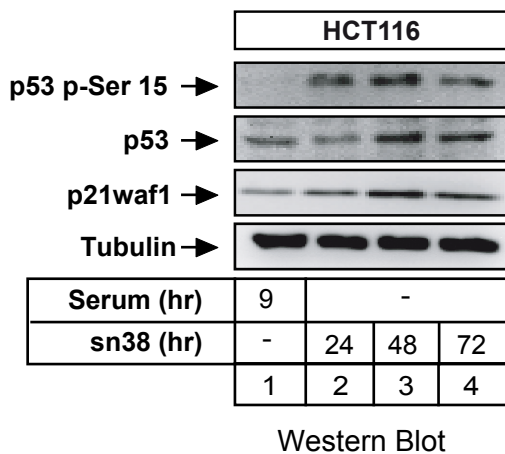

B.

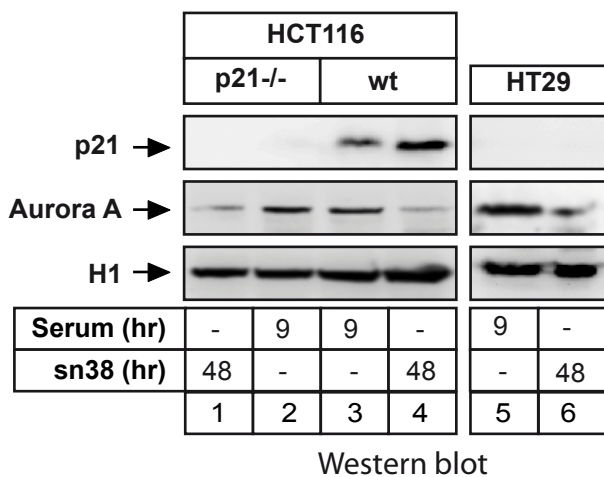

C.

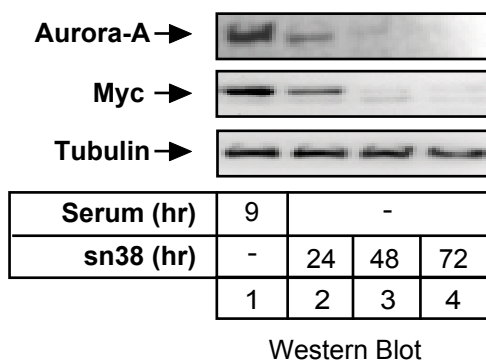

D.

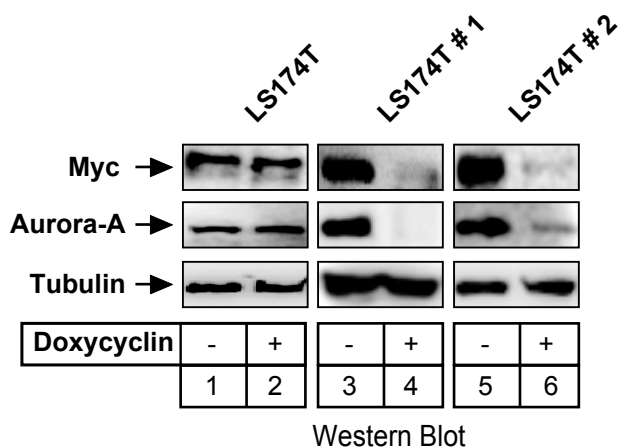

Supplement: MOESM2 [file 9554654]
